# Supplementary material for: Three dimensional multiphoton imaging of fresh and whole mount developing mouse mammary glands
Source: PubMed Central journal article supplement (PMC3750743; doi:10.1186/1471-2407-13-373), 2013-08-06
Supplement: 1471-2407-13-373-S5.pdf [file 1471-2407-13-373-S5.pdf]

**A**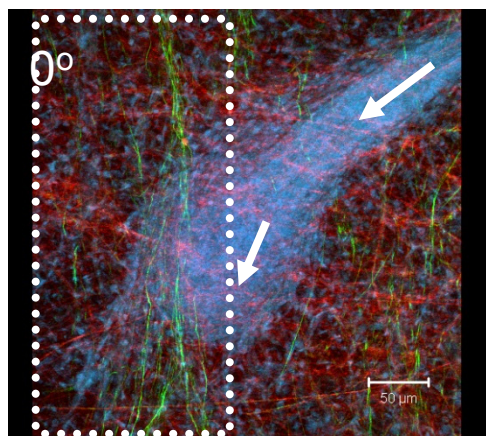**B**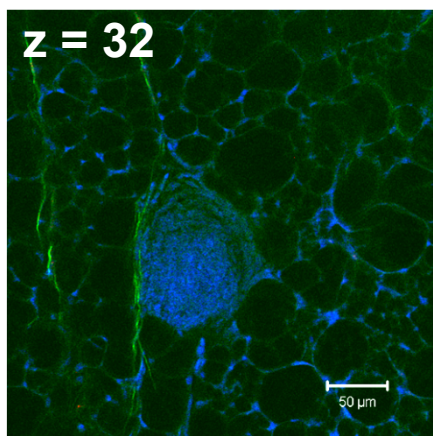

SHG-B/  
CA/  
SHG-F

**3D rotation movie****C**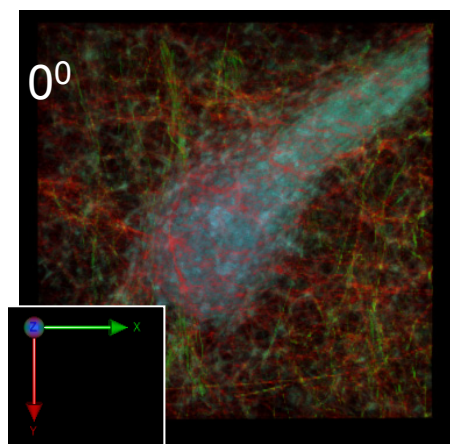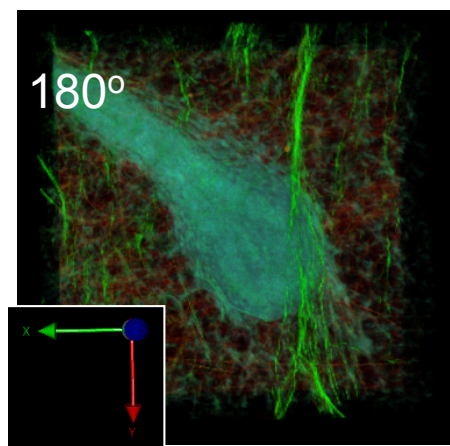**D**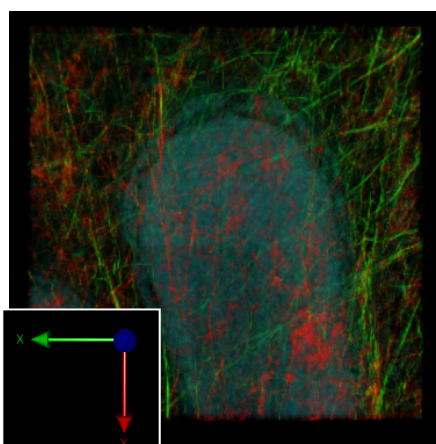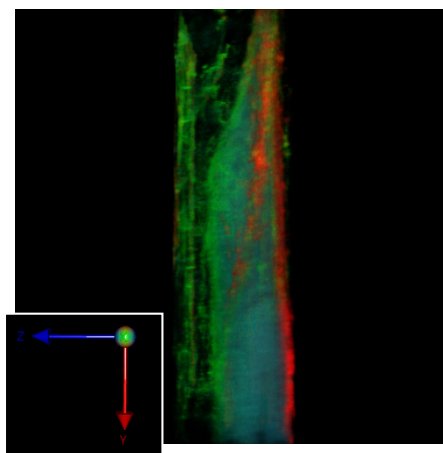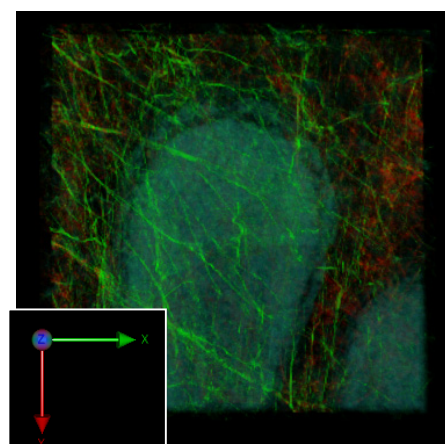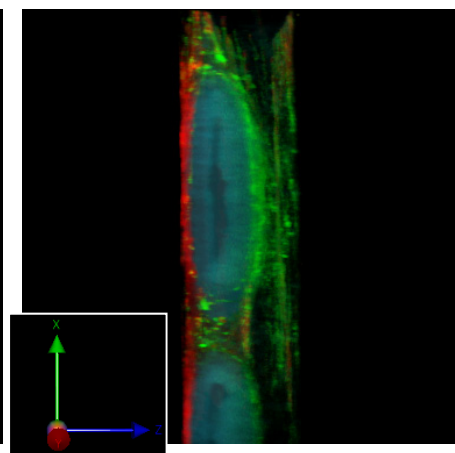**3D rotation and Z-stack movies**
